# Supplementary material
Source: PubMed Central journal article supplement (PMC7699458)
Supplement: NIHMS1637444-supplement-Appendix_A.pdf [file NIHMS1637444-supplement-Appendix_A.pdf]

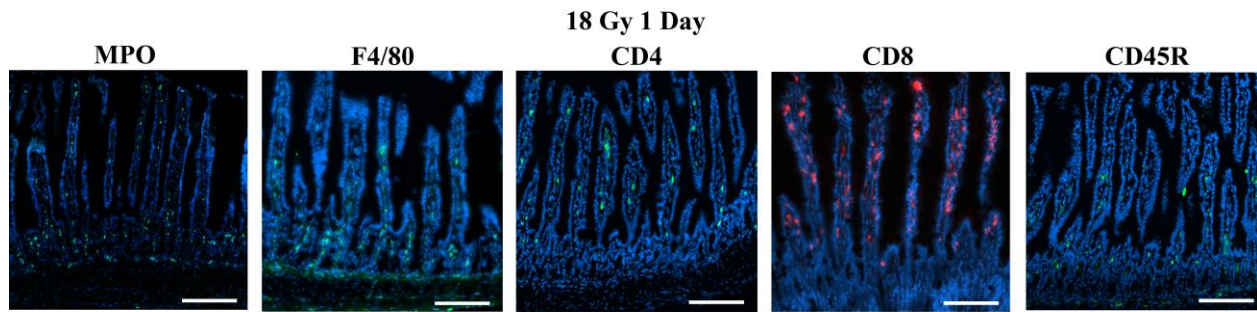

**Figure A1**  
Immunofluorescence from 1 day post 18 Gy. Scale bar 50  $\mu\text{m}$ .

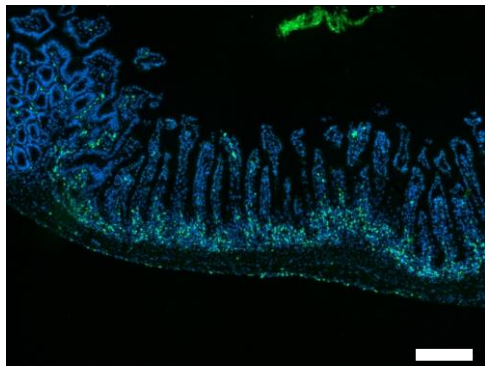

**Figure A2**  
Myeloperoxidase immunofluorescence 3.5 days post-IR showing clear demarcation between irradiated and unirradiated intestine. Scale bar 200  $\mu\text{m}$

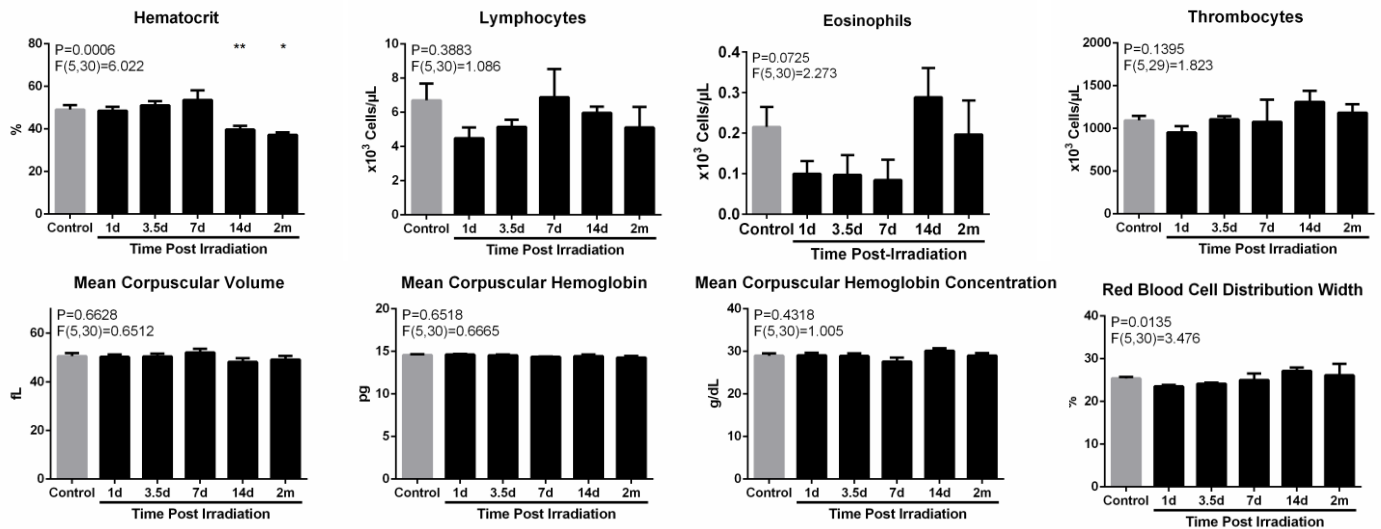

**Figure A3**  
Additional parameters from complete blood count analysis post-IR with 18 Gy.

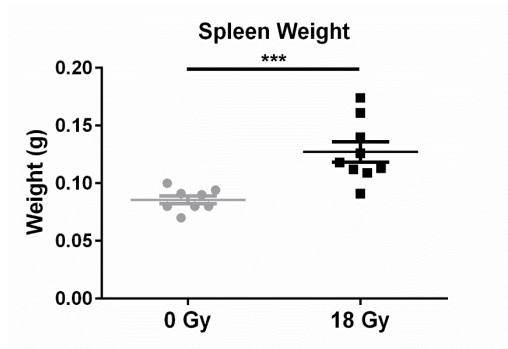

**Figure A4**  
Spleen weight 14 days post-IR.

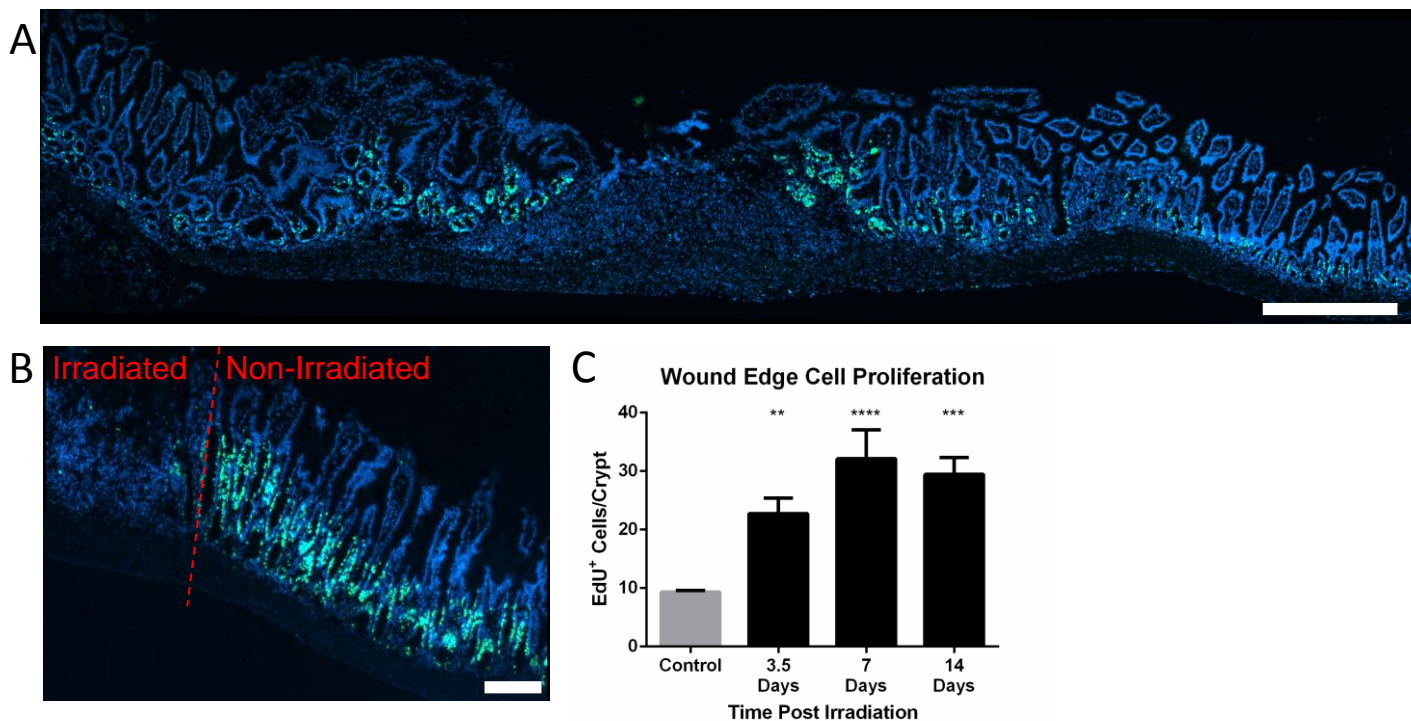

**Figure A5**  
(A) EdU cell proliferation assay in C57Bl/6 showing ablation of cell proliferation in the irradiated intestine. Scale bar 500  $\mu$ m. (B) hyperplasia on the wound edges, then normal proliferation lateral to the irradiated area. (C) Quantification of approximately 10 total crypts lateral to either wound edge.
